# Supplementary material
Source: Springer Nature journal article supplement (https://www.springermedizin.de/resource/supplementary/13012_2012_595_MOESM2_ESM.pdf/9630358)
Supplement: MOESM2 [file 9630358]

**Number of studies describing  
implementation strategies**

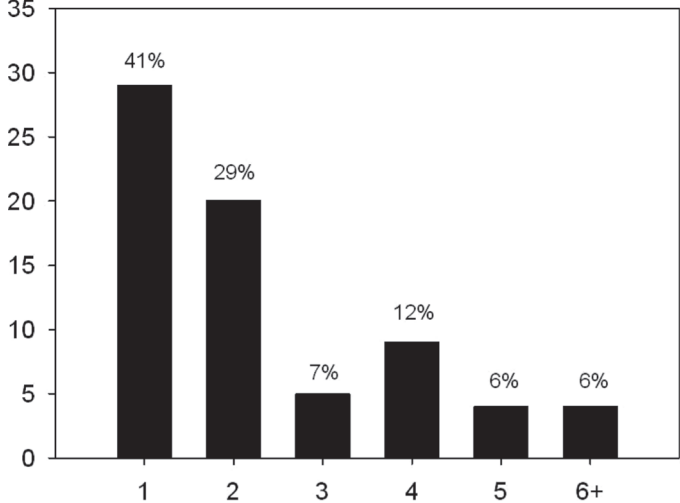

**Number of implementation strategies in a study**
